# Supplementary material for: Quantification and Characterisation of Pre-Production Pellet Pollution in the Avon-Heathcote Estuary/Ihutai, Aotearoa-New Zealand
Source: MDPI journal article supplement (doi:10.3390/microplastics1010005), 2022-01-17
Supplement: s1 [file s1]

**Table S1.** Visuals of sampling sites and sample quadrats with details of substrate type

| Sample | Site             | Substrate Type            | Photo                                                                                | Transect                                                                             |
|--------|------------------|---------------------------|--------------------------------------------------------------------------------------|--------------------------------------------------------------------------------------|
| 1      | Ferrymead Bridge | Mud                       |     |  |
| 2      | Ferrymead Bridge | Washed-up debris          |    |                                                                                      |
| 3      | Ferrymead Bridge | Washed-up debris          |   |                                                                                      |
| 4      | Ferrymead Bridge | Washed-up debris          |  |                                                                                      |
| 5      | Ferrymead Bridge | Washed-up debris and rock |  |                                                                                      |

|    |                 |                                          |                                                                                      |                                                                                      |
|----|-----------------|------------------------------------------|--------------------------------------------------------------------------------------|--------------------------------------------------------------------------------------|
| 6  | Humphreys Drive | Washed-up debris                         |    |  |
| 7  | Humphreys Drive | Mud                                      |    |                                                                                      |
| 8  | Humphreys Drive | Washed-up debris                         |    |                                                                                      |
| 9  | Humphreys Drive | Washed-up debris                         |  |                                                                                      |
| 10 | Humphreys Drive | Washed-up debris and concrete flood wall |  |                                                                                      |



|    |             |                  |                                                                                      |                                                                                      |
|----|-------------|------------------|--------------------------------------------------------------------------------------|--------------------------------------------------------------------------------------|
| 11 | Sandy Point | Washed-up debris |    |  |
| 12 | Sandy Point | Washed-up debris |    |                                                                                      |
| 13 | Sandy Point | Washed-up debris |   |                                                                                      |
| 14 | Sandy Point | Vegetation       |  |                                                                                      |
| 15 | Sandy Point | Mud              |   |                                                                                      |

|    |               |                          |                                                                                      |                                                                                      |
|----|---------------|--------------------------|--------------------------------------------------------------------------------------|--------------------------------------------------------------------------------------|
| 16 | Bridge Street | Mud and washed-up debris |    |  |
| 17 | Bridge Street | Mud and washed-up debris |    |                                                                                      |
| 18 | Bridge Street | Mud and washed-up debris |   |                                                                                      |
| 19 | Bridge Street | Mud and washed-up debris |  |                                                                                      |
| 20 | Bridge Street | Mud and washed-up debris |   |                                                                                      |



|    |                         |                           |                                                                                      |                                                                                      |
|----|-------------------------|---------------------------|--------------------------------------------------------------------------------------|--------------------------------------------------------------------------------------|
| 21 | South New Brighton Park | Sand                      |     |  |
| 22 | South New Brighton Park | Sand and washed-up debris |    |                                                                                      |
| 23 | South New Brighton Park | Washed-up debris          |   |                                                                                      |
| 24 | South New Brighton Park | Mud                       |  |                                                                                      |
| 25 | South New Brighton Park | Mud                       |  |                                                                                      |

|    |                |                            |                                                                                      |                                                                                      |
|----|----------------|----------------------------|--------------------------------------------------------------------------------------|--------------------------------------------------------------------------------------|
| 26 | Penguin Street | Washed-up debris           |    |  |
| 27 | Penguin Street | Washed-up debris           |    |                                                                                      |
| 28 | Penguin Street | Washed-up debris and rocks |   |                                                                                      |
| 29 | Penguin Street | Washed-up debris and mud   |  |                                                                                      |
| 30 | Penguin Street | Washed-up debris and rocks |  |                                                                                      |



|    |                 |                       |                                                                                      |                                                                                      |
|----|-----------------|-----------------------|--------------------------------------------------------------------------------------|--------------------------------------------------------------------------------------|
| 31 | Southshore Spit | Sand/washed-up debris |    |  |
| 32 | Southshore Spit | Sand/washed-up debris |    |                                                                                      |
| 33 | Southshore Spit | Sand/washed-up debris |   |                                                                                      |
| 34 | Southshore Spit | Sand/washed-up debris |  |                                                                                      |
| 35 | Southshore Spit | Sand/washed-up debris |  |                                                                                      |
